# Supplementary material for: ASCI 2010 appropriateness criteria for cardiac magnetic resonance imaging: a report of the Asian Society of Cardiovascular Imaging cardiac computed tomography and cardiac magnetic resonance imaging guideline working group
Source: PubMed Central journal article supplement — Int J Cardiovasc Imaging. 2010 Aug 24;26(Suppl 2):173–86. doi: 10.1007/s10554-010-9687-z (PMC3252886; doi:10.1007/s10554-010-9687-z), 2010-08-24
Supplement: 10554_2010_9687_MOESM1_ESM.pdf [file 10554_2010_9687_MOESM1_ESM.pdf]

# ASCI cardiac MR appropriateness criteria questionnaire

**Please provide your name, degree and affiliation correctly as they should appear in the publication.**

**Name and degree (ex. John Doe, MD, PhD):** \_\_\_\_\_

**Department and Hospital/Institute:** \_\_\_\_\_

**Hospital type (University hospital, Medical center, City hospital, Imaging center...):** \_\_\_\_\_ **How many in-patient beds?** \_\_\_\_\_

## **Experience:**

How many years have you been in the field of cardiovascular medicine? \_\_\_\_\_

Radiologists: How many cardiac MR examinations have you ever performed in the past? \_\_\_\_\_.

Cardiologists: How many examinations have you ever performed/ordered in the past? Cardiac MR: \_\_\_\_\_, PCI: \_\_\_\_\_.

## **Scoring appropriateness: (1 to 9)**

Score 7 to 9: Appropriate test for the specific indication. Test is generally acceptable and a reasonable approach for the listed indication.

Score 4 to 6: Uncertain for specific indication. Test may be generally acceptable and may be a reasonable approach for the indication. Uncertainty also implies that more research or patient information or both are needed to classify the indication definitively.

Score 1 to 3: Inappropriate test for specific indication. Test is not generally acceptable and is not a reasonable approach for the indication.

## **Definition of 'cardiac MR':**

If not specified, cardiac MR protocol may include motion, stress and rest perfusion, delayed gadolinium enhancement, flow measurement, black blood T2WI, and MR coronary angiography

**Note:** In the following tables, assume the logical operator between each variable listed for an indication is “AND” unless otherwise noted (e.g., Low pre-test probability of CAD AND No ECG changes and serial enzymes negative).

## **Abbreviations:**

ACS: acute coronary syndromes; ARVD: arrhythmogenic right ventricular dysplasia; ASCI: Asian Society of Cardiovascular Imaging; ASD: atrial septal defect; CABG: coronary artery bypass grafting surgery; CAD: coronary artery disease; CCT: cardiac computed tomography; CHD: coronary heart disease; CMR: cardiac magnetic resonance imaging; CT: computed tomography; CTCA: computed tomography coronary angiography; ECG: electrocardiogram; MRCA: magnetic resonance coronary arteriography; MRI: magnetic resonance imaging; PCI: percutaneous coronary intervention; TEE: transesophageal echocardiography; VSD: ventricular septal defect.

**Table 1 – Detection of CAD: Symptomatic**

| ASCI CMR indication No.                       |                                                                                                  | <b>Cardiac MR appropriateness<br/>(Please fill in your scoring here,<br/>1: inappropriate to 9: appropriate)</b> |
|-----------------------------------------------|--------------------------------------------------------------------------------------------------|------------------------------------------------------------------------------------------------------------------|
| <b>Evaluation of Chest Pain Syndrome</b>      |                                                                                                  |                                                                                                                  |
| 1                                             | - Low pre-test probability of CAD<br>- ECG interpretable AND able to exercise                    |                                                                                                                  |
| 2                                             | - Intermediate pre-test probability of CAD<br>- ECG interpretable AND able to exercise           |                                                                                                                  |
| 3                                             | - Intermediate pre-test probability of CAD<br>- ECG uninterpretable OR unable to exercise        |                                                                                                                  |
| 4                                             | - High pre-test probability of CAD                                                               |                                                                                                                  |
| <b>Evaluation of Intra-Cardiac Structures</b> |                                                                                                  |                                                                                                                  |
| 5                                             | - Evaluation of suspected coronary anomalies                                                     |                                                                                                                  |
| <b>Acute Chest Pain</b>                       |                                                                                                  |                                                                                                                  |
| 6                                             | - Low pre-test probability of CAD<br>- No ECG changes and serial enzymes negative                |                                                                                                                  |
| 7                                             | - Intermediate pre-test probability of CAD<br>- No ECG changes and serial enzymes negative       |                                                                                                                  |
| 8                                             | - High pre-test probability of CAD<br>- No ECG changes and serial enzymes negative               |                                                                                                                  |
| 9                                             | - High pre-test probability of CAD<br>- ECG—ST-segment elevation and/or positive cardiac enzymes |                                                                                                                  |

**Table 2 – Detection of CAD: Asymptomatic (Without Chest Pain Syndrome)**

| ASCI                |                                           | Cardiac MR appropriateness |
|---------------------|-------------------------------------------|----------------------------|
| <b>Asymptomatic</b> |                                           |                            |
| 10                  | - Low CHD risk (Framingham risk criteria) |                            |
| 11                  | - Moderate CHD risk (Framingham)          |                            |
| 12                  | - High CHD risk (Framingham)              |                            |

**Table 3 – Risk Assessment: General Population**

| ASCI                |                                  | Cardiac MR appropriateness |
|---------------------|----------------------------------|----------------------------|
| <b>Asymptomatic</b> |                                  |                            |
| 13                  | - Low CHD risk (Framingham)      | (Use of coronary MRA)      |
| 14                  | - Moderate CHD risk (Framingham) | (Use of coronary MRA)      |
| 15                  | - High CHD risk (Framingham)     | (Use of coronary MRA)      |

**Table 4 - Detection of CAD with Prior Test Results**

| ASCI                                     |                                                                                                | Cardiac MR appropriateness |
|------------------------------------------|------------------------------------------------------------------------------------------------|----------------------------|
| <b>Evaluation of Chest Pain Syndrome</b> |                                                                                                |                            |
| 16                                       | - Uninterpretable or equivocal stress test (exercise, perfusion, or stress echo)               |                            |
| 17                                       | - Evidence of moderate to severe ischemia on stress test (exercise, perfusion, or stress echo) |                            |

**Table 5 – Risk Assessment with Prior Test Results**

| ASCI                |                                                                                                                                   | Cardiac MR appropriateness |
|---------------------|-----------------------------------------------------------------------------------------------------------------------------------|----------------------------|
| <b>Asymptomatic</b> |                                                                                                                                   |                            |
| 18                  | - Normal prior stress test (exercise, nuclear, echo, MRI)<br>- High CHD risk (Framingham)<br>- Within 1 year of prior stress test |                            |
| 19                  | - Equivocal stress test (exercise, stress SPECT, or stress echo)<br>- Intermediate CHD risk (Framingham)                          |                            |
| 20                  | - Coronary angiography (catheterization or CT)<br>- Stenosis of unclear significance                                              |                            |

**Table 6 – CAD Detection in Pediatric Patients with Kawasaki Disease**

| ASCI                |                                                                                                          | Cardiac MR appropriateness |
|---------------------|----------------------------------------------------------------------------------------------------------|----------------------------|
| <b>Asymptomatic</b> |                                                                                                          |                            |
| 21                  | - No previous definitive test (invasive angiography, MRCA or CTCA) available                             |                            |
| 22                  | - Previous tests (invasive angiography, CMR or CCT) documented coronary aneurysm/stenosis, for follow up |                            |
| <b>Symptomatic</b>  |                                                                                                          |                            |
| 23                  | - No previous definitive test (invasive angiography, MRCA or CTCA) available                             |                            |
| 24                  | - Previous tests (angiography, CMR or CCT) documented coronary aneurysm/stenosis, for follow up          |                            |

**Table 7 - Risk Assessment: Preoperative Evaluation for Non-Cardiac Surgery**

| ASCI                                      |                                   | Cardiac MR appropriateness |
|-------------------------------------------|-----------------------------------|----------------------------|
| <b>Low-Risk Surgery</b>                   |                                   |                            |
| 25                                        | - Intermediate perioperative risk |                            |
| <b>Intermediate- or High-Risk Surgery</b> |                                   |                            |
| 26                                        | - Intermediate perioperative risk |                            |

**Table 8 – Risk Assessment: Preoperative Evaluation for Cardiac Surgery or Endovascular Intervention**

| ASCI                           |                                                                                                                 | Cardiac MR appropriateness |
|--------------------------------|-----------------------------------------------------------------------------------------------------------------|----------------------------|
| <b>Preoperative evaluation</b> |                                                                                                                 |                            |
| 27                             | - Use of MRI for CAD evaluation before valve surgery                                                            |                            |
| 28                             | - Anatomic assessment before percutaneous device closure of ASD or VSD or percutaneous aortic valve replacement |                            |
| 29                             | - Evaluation of complex lesions before PCI (ie, chronic total occlusions, bifurcation lesions)                  |                            |

**Table 9 - Detection of CAD: Post-Revascularization (PCI or CABG)**

| ASCI                                     |                                                                                                     | Cardiac MR appropriateness |
|------------------------------------------|-----------------------------------------------------------------------------------------------------|----------------------------|
| <b>Evaluation of Chest Pain Syndrome</b> |                                                                                                     |                            |
| 30                                       | - Evaluation of bypass grafts and coronary anatomy                                                  |                            |
| 31                                       | - History of percutaneous revascularization with stents                                             |                            |
| <b>Asymptomatic</b>                      |                                                                                                     |                            |
| 32                                       | - Evaluation of bypass grafts and coronary anatomy<br>- Less than 5 years after CABG                |                            |
| 33                                       | - Evaluation of bypass grafts and coronary anatomy<br>- Greater than or equal to 5 years after CABG |                            |
| 34                                       | - Evaluation for in-stent restenosis and coronary anatomy after PCI                                 |                            |

**Table 10 – Structure and Function**

| ASCI                                                     |                                                                                                                                                                     | Cardiac MR appropriateness |
|----------------------------------------------------------|---------------------------------------------------------------------------------------------------------------------------------------------------------------------|----------------------------|
| <b>Morphology</b>                                        |                                                                                                                                                                     |                            |
| 35                                                       | - Assessment of complex congenital heart disease including anomalies of coronary circulation, great vessels, and cardiac chambers and valves                        |                            |
| 36                                                       | - Assessment of post-operative congenital heart disease, such as residual pulmonary stenosis, ventricular septal defect and patency check for Blalock-Taussig shunt |                            |
| 37                                                       | - Evaluation in patients with new onset heart failure to assess etiology                                                                                            |                            |
| <b>Evaluation of Ventricular and Valvular Function</b>   |                                                                                                                                                                     |                            |
| 38                                                       | - Evaluation of LV function following myocardial infarction OR in heart failure patients                                                                            |                            |
| 39                                                       | - Evaluation of LV function following myocardial infarction OR in heart failure patients<br>- Patients with technically limited images from echocardiogram          |                            |
| 40                                                       | - Quantification of LV function<br>- Discordant information that is clinically significant from prior tests                                                         |                            |
| 41                                                       | - Evaluation of specific cardiomyopathies (infiltrative [amyloid, sarcoid], HCM, or due to cardiotoxic therapies)                                                   |                            |
| 42                                                       | - Characterization of native and prosthetic cardiac valves<br>- Patients with technically limited images from echocardiogram or TEE                                 |                            |
| 43                                                       | - Evaluation for arrhythmogenic right ventricular cardiomyopathy (ARVC)<br>- Patients presenting with syncope or ventricular arrhythmia                             |                            |
| 44                                                       | - Evaluation of myocarditis or myocardial infarction with normal coronary arteries<br>- Positive cardiac enzymes without obstructive atherosclerosis on angiography |                            |
| <b>Evaluation of Intra- and Extra-Cardiac Structures</b> |                                                                                                                                                                     |                            |

|    |                                                                                                                                                                                                           |  |
|----|-----------------------------------------------------------------------------------------------------------------------------------------------------------------------------------------------------------|--|
| 45 | - Evaluation of cardiac mass (suspected tumor or thrombus)<br>- Patients with technically limited images from echocardiogram or TEE                                                                       |  |
| 46 | - Evaluation of pericardial conditions (pericardial mass, constrictive pericarditis, or complications of cardiac surgery)<br>- Patients with technically limited images from echocardiogram or TEE        |  |
| 47 | - Evaluation of pulmonary vein anatomy prior to invasive radiofrequency ablation for atrial fibrillation<br>- Left atrial and pulmonary venous anatomy including dimensions of veins for mapping purposes |  |

**Table 11 – Detection of Myocardial Scar and Viability**

| ASCI                                 |                                                                                                                                     | Cardiac MR appropriateness |
|--------------------------------------|-------------------------------------------------------------------------------------------------------------------------------------|----------------------------|
| <b>Evaluation of Myocardial Scar</b> |                                                                                                                                     |                            |
| 48                                   | - To determine the location and extent of myocardial infarction including ‘no-reflow’ regions<br>- Post-acute myocardial infarction |                            |
| 49                                   | - To detect post PCI myocardial necrosis                                                                                            |                            |
| 50                                   | - To determine viability prior to revascularization                                                                                 |                            |

**Comments/Suggestions**

|                                                                                   |  |
|-----------------------------------------------------------------------------------|--|
| <b>Do you have any further indication suggestion for cardiac MR? Please list.</b> |  |
| <b>Any other comments or suggestions?</b>                                         |  |
