# Supplementary material for: ASCI 2010 appropriateness criteria for cardiac magnetic resonance imaging: a report of the Asian Society of Cardiovascular Imaging cardiac computed tomography and cardiac magnetic resonance imaging guideline working group
Source: Springer Nature journal article supplement (doi:10.1007/s10554-010-9687-z), 2010-08-23
Supplement: MOESM2 [file 8854184]

### ASCI 2010 CMR Appropriateness Criteria : Rating Result

| No     | Speciality | ASCI01 | ASCI02 | ASCI03 | ASCI04 | ASCI05 | ASCI06 | ASCI07 | ASCI08 | ASCI09 | ASCI10 | ASCI11 | ASCI12 | ASCI13 | ASCI14 | ASCI15 | ASCI16 | ASCI17 | ASCI18 | ASCI19 | ASCI20 | ASCI21 | ASCI22 | ASCI23 | ASCI24 | ASCI25 |
|--------|------------|--------|--------|--------|--------|--------|--------|--------|--------|--------|--------|--------|--------|--------|--------|--------|--------|--------|--------|--------|--------|--------|--------|--------|--------|--------|
| 1      | Radiology  | 5      | 7      | 8      | 6      | 7      | 5      | 8      | 6      | 6      | 2      | 5      | 6      | 3      | 6      | 7      | 8      | 6      | 6      | 7      | 8      | 7      | 8      | 9      | 9      | 5      |
| 2      | Radiology  | 4      | 5      | 7      | 4      | 8      | 4      | 7      | 4      | 1      | 1      | 2      | 4      | 1      | 2      | 3      | 7      | 4      | 3      | 6      | 5      | 7      | 8      | 5      | 7      | 4      |
| 3      | Radiology  | 4      | 7      | 9      | 9      | 3      | 3      | 5      | 7      | 9      | 4      | 5      | 7      | 3      | 4      | 7      | 9      | 9      | 7      | 9      | 9      | 5      | 7      | 8      | 8      | 7      |
| 4      | Radiology  | 3      | 3      | 3      | 3      | 7      | 5      | 5      | 5      | 5      | 1      | 2      | 3      | 3      | 3      | 3      | 5      | 5      | 3      | 3      | 3      | 7      | 7      | 9      | 9      | 2      |
| 5      | Radiology  | 1      | 1      | 1      | 1      | 8      | 2      | 2      | 2      | 2      | 7      | 5      | 5      | 7      | 6      | 3      | 3      | 1      | 6      | 5      | 8      | 5      | 8      | 3      | 3      | 5      |
| 6      | Radiology  | 6      | 8      | 9      | 7      | 8      | 8      | 8      | 8      | 2      | 7      | 8      | 9      | 7      | 8      | 8      | 8      | 5      | 7      | 9      | 9      | 7      | 7      | 7      | 7      | 7      |
| 7      | Cardiology | 5      | 6      | 8      | 9      | 9      | 7      | 7      | 5      | 3      | 5      | 8      | 9      | 7      | 9      | 9      | 8      | 5      | 5      | 8      | 8      | 5      | 9      | 5      | 7      | 8      |
| 8      | Radiology  | 8      | 8      | 9      | 8      | 9      | 7      | 5      | 3      | 1      | 5      | 8      | 8      | 5      | 7      | 7      | 9      | 7      | 7      | 7      | 7      | 9      | 9      | 9      | 9      | 8      |
| 9      | Radiology  | 2      | 4      | 8      | 8      | 8      | 4      | 7      | 9      | 7      | 1      | 7      | 8      | 3      | 3      | 3      | 7      | 3      | 3      | 7      | 3      | 2      | 8      | 8      | 9      | 6      |
| 10     | Cardiology | 2      | 4      | 4      | 6      | 7      | 1      | 3      | 5      | 5      | 2      | 4      | 6      | 2      | 6      | 8      | 8      | 8      | 7      | 7      | 6      | 7      | 8      | 8      | 9      | 5      |
| 11     | Radiology  | 2      | 2      | 2      | 1      | 8      | 5      | 6      | 6      | 1      | 1      | 2      | 4      | 6      | 6      | 5      | 8      | 4      | 5      | 6      | 7      | 8      | 9      | 9      | 9      | 2      |
| 12     | Radiology  | 1      | 3      | 8      | 5      | 7      | 1      | 3      | 5      | 7      | 1      | 1      | 3      | 1      | 1      | 1      | 7      | 5      | 1      | 3      | 5      | 1      | 5      | 3      | 5      | 1      |
| 13     | Radiology  | 1      | 1      | 5      | 7      | 7      | 1      | 1      | 4      | 8      | 1      | 5      | 7      | 1      | 5      | 6      | 8      | 8      | 5      | 7      | 8      | 6      | 8      | 8      | 9      | 3      |
| 14     | Radiology  | 2      | 3      | 4      | 5      | 7      | 2      | 2      | 2      | 1      | 1      | 2      | 3      | 2      | 3      | 5      | 8      | 6      | 1      | 7      | 2      | 5      | 8      | 8      | 9      | 1      |
| 15     | Radiology  | 3      | 6      | 8      | 6      | 8      | 3      | 5      | 7      | 1      | 4      | 6      | 7      | 1      | 3      | 5      | 8      | 5      | 3      | 5      | 8      | 5      | 6      | 7      | 6      | 2      |
| 16     | Radiology  | 3      | 5      | 9      | 9      | 3      | 2      | 2      | 8      | 9      | 1      | 3      | 7      | 6      | 4      | 8      | 8      | 6      | 3      | 3      | 6      | 8      | 6      | 8      | 6      | 4      |
| 17     | Radiology  | 4      | 5      | 5      | 6      | 4      | 4      | 5      | 5      | 6      | 4      | 4      | 4      | 1      | 1      | 2      | 5      | 5      | 3      | 6      | 2      | 1      | 2      | 2      | 3      | 3      |
| 18     | Radiology  | 2      | 5      | 7      | 5      | 7      | 2      | 6      | 5      | 1      | 1      | 5      | 6      | 4      | 2      | 1      | 7      | 3      | 2      | 6      | 7      | 4      | 7      | 3      | 6      | 2      |
| 19     | Cardiology | 2      | 4      | 7      | 4      | 8      | 5      | 7      | 5      | 1      | 1      | 2      | 2      | 1      | 1      | 1      | 6      | 2      | 2      | 6      | 7      | 3      | 3      | 3      | 3      | 1      |
| 20     | Cardiology | 2      | 4      | 7      | 7      | 8      | 5      | 8      | 8      | 5      | 1      | 5      | 8      | 1      | 5      | 5      | 8      | 2      | 2      | 8      | 8      | 7      | 8      | 8      | 8      | 2      |
| 21     | Radiology  | 2      | 4      | 6      | 5      | 9      | 1      | 5      | 6      | 1      | 1      | 1      | 2      | 3      | 3      | 3      | 6      | 2      | 2      | 6      | 7      | 4      | 4      | 4      | 4      | 1      |
| 22     | Cardiology | 1      | 4      | 8      | 4      | 8      | 2      | 7      | 5      | 1      | 1      | 2      | 3      | 1      | 2      | 3      | 6      | 2      | 1      | 7      | 8      | 6      | 7      | 7      | 8      | 1      |
| 23     | Cardiology | 2      | 3      | 7      | 4      | 8      | 5      | 7      | 2      | 1      | 1      | 3      | 5      | 1      | 1      | 1      | 5      | 1      | 1      | 6      | 7      | 3      | 2      | 7      | 7      | 2      |
| Median |            | 2      | 4      | 7      | 6      | 8      | 4      | 5      | 5      | 2      | 1      | 4      | 6      | 3      | 3      | 5      | 8      | 5      | 3      | 6      | 7      | 5      | 7      | 7      | 7      | 3      |

| No     | Speciality | ASCI26 | ASCI27 | ASCI28 | ASCI29 | ASCI30 | ASCI31 | ASCI32 | ASCI33 | ASCI34 | ASCI35 | ASCI36 | ASCI37 | ASCI38 | ASCI39 | ASCI40 | ASCI41 | ASCI42 | ASCI43 | ASCI44 | ASCI45 | ASCI46 | ASCI47 | ASCI48 | ASCI49 | ASCI50 |   |
|--------|------------|--------|--------|--------|--------|--------|--------|--------|--------|--------|--------|--------|--------|--------|--------|--------|--------|--------|--------|--------|--------|--------|--------|--------|--------|--------|---|
| 1      | Radiology  | 7      | 7      | 7      | 6      | 6      | 4      | 4      | 3      | 2      | 9      | 8      | 9      | 9      | 9      | 9      | 9      | 3      | 8      | 8      | 9      | 7      | 7      | 9      | 7      | 8      |   |
| 2      | Radiology  | 7      | 5      | 5      | 3      | 4      | 5      | 4      | 5      | 3      | 8      | 7      | 9      | 8      | 9      | 9      | 9      | 7      | 8      | 9      | 9      | 8      | 8      | 9      | 4      | 9      |   |
| 3      | Radiology  | 8      | 6      | 8      | 8      | 6      | 4      | 2      | 2      | 1      | 7      | 7      | 8      | 9      | 9      | 9      | 9      | 7      | 9      | 9      | 9      | 9      | 7      | 9      | 9      | 9      |   |
| 4      | Radiology  | 2      | 3      | 3      | 3      | 5      | 5      | 3      | 3      | 3      | 9      | 9      | 9      | 9      | 9      | 9      | 7      | 8      | 7      | 9      | 9      | 7      | 5      | 9      | 9      | 9      |   |
| 5      | Radiology  | 2      | 2      | 2      | 2      | 2      | 1      | 2      | 1      | 1      | 5      | 4      | 5      | 5      | 9      | 7      | 8      | 4      | 7      | 8      | 8      | 7      | 5      | 9      | 9      | 9      |   |
| 6      | Radiology  | 8      | 7      | 7      | 9      | 7      | 8      | 8      | 8      | 7      | 8      | 8      | 9      | 8      | 9      | 9      | 9      | 7      | 9      | 9      | 9      | 9      | 6      | 9      | 9      | 9      |   |
| 7      | Cardiology | 8      | 8      | 9      | 5      | 8      | 8      | 8      | 8      | 8      | 8      | 8      | 8      | 9      | 9      | 9      | 9      | 5      | 7      | 9      | 9      | 9      | 9      | 9      | 9      | 9      |   |
| 8      | Radiology  | 8      | 7      | 7      | 6      | 5      | 6      | 5      | 5      | 5      | 8      | 8      | 8      | 9      | 9      | 9      | 9      | 8      | 7      | 9      | 8      | 8      | 8      | 9      | 9      | 9      |   |
| 9      | Radiology  | 8      | 7      | 7      | 9      | 4      | 2      | 7      | 8      | 7      | 9      | 9      | 8      | 7      | 9      | 9      | 9      | 8      | 9      | 9      | 9      | 9      | 6      | 8      | 8      | 9      |   |
| 10     | Cardiology | 5      | 6      | 6      | 3      | 5      | 5      | 5      | 5      | 5      | 8      | 8      | 8      | 9      | 9      | 9      | 9      | 7      | 8      | 9      | 9      | 9      | 9      | 9      | 7      | 9      |   |
| 11     | Radiology  | 4      | 6      | 7      | 8      | 2      | 1      | 7      | 7      | 5      | 7      | 7      | 8      | 9      | 9      | 8      | 9      | 8      | 9      | 9      | 9      | 8      | 7      | 7      | 9      | 9      |   |
| 12     | Radiology  | 1      | 7      | 7      | 3      | 7      | 7      | 7      | 7      | 7      | 8      | 8      | 9      | 9      | 9      | 9      | 9      | 9      | 9      | 9      | 9      | 9      | 6      | 9      | 9      | 9      |   |
| 13     | Radiology  | 6      | 6      | 7      | 9      | 8      | 5      | 5      | 5      | 5      | 9      | 9      | 5      | 4      | 7      | 7      | 8      | 6      | 8      | 8      | 9      | 7      | 7      | 8      | 8      | 9      |   |
| 14     | Radiology  | 3      | 8      | 7      | 5      | 2      | 2      | 2      | 5      | 2      | 9      | 9      | 7      | 7      | 9      | 9      | 9      | 8      | 8      | 9      | 9      | 7      | 7      | 9      | 9      | 9      |   |
| 15     | Radiology  | 6      | 5      | 7      | 4      | 4      | 5      | 1      | 2      | 4      | 8      | 7      | 7      | 7      | 8      | 9      | 9      | 8      | 9      | 8      | 9      | 9      | 8      | 9      | 8      | 9      |   |
| 16     | Radiology  | 4      | 6      | 4      | 7      | 6      | 3      | 1      | 1      | 2      | 8      | 6      | 9      | 7      | 9      | 9      | 9      | 1      | 7      | 8      | 8      | 8      | 7      | 9      | 9      | 9      |   |
| 17     | Radiology  | 5      | 2      | 6      | 8      | 5      | 4      | 4      | 4      | 1      | 7      | 8      | 9      | 9      | 9      | 9      | 9      | 6      | 9      | 9      | 8      | 8      | 6      | 9      | 9      | 9      |   |
| 18     | Radiology  | 6      | 4      | 7      | 3      | 2      | 1      | 2      | 2      | 1      | 9      | 9      | 6      | 6      | 8      | 9      | 9      | 7      | 9      | 8      | 9      | 8      | 8      | 7      | 5      | 9      |   |
| 19     | Cardiology | 2      | 2      | 2      | 2      | 2      | 2      | 2      | 3      | 2      | 8      | 8      | 8      | 8      | 9      | 8      | 8      | 8      | 8      | 8      | 8      | 8      | 8      | 9      | 8      | 8      |   |
| 20     | Cardiology | 5      | 2      | 8      | 5      | 6      | 6      | 5      | 5      | 5      | 9      | 9      | 8      | 7      | 9      | 9      | 8      | 7      | 7      | 8      | 9      | 7      | 7      | 8      | 7      | 8      |   |
| 21     | Radiology  | 5      | 3      | 4      | 1      | 2      | 1      | 1      | 1      | 1      | 8      | 8      | 8      | 7      | 9      | 8      | 9      | 7      | 7      | 8      | 9      | 8      | 8      | 8      | 5      | 9      |   |
| 22     | Cardiology | 5      | 5      | 7      | 5      | 3      | 4      | 1      | 2      | 1      | 9      | 8      | 5      | 5      | 7      | 8      | 8      | 8      | 8      | 8      | 8      | 9      | 8      | 8      | 9      | 8      | 9 |
| 23     | Cardiology | 6      | 1      | 2      | 1      | 1      | 1      | 1      | 1      | 1      | 7      | 7      | 7      | 8      | 8      | 8      | 8      | 8      | 8      | 8      | 8      | 8      | 8      | 7      | 4      | 9      |   |
| Median |            | 5      | 6      | 7      | 5      | 5      | 4      | 4      | 4      | 3      | 8      | 8      | 8      | 8      | 9      | 9      | 9      | 7      | 8      | 9      | 9      | 8      | 7      | 9      | 8      | 9      |   |
